# Supplementary material for: Psychological and Antibacterial Effects of Footbath Using the Lindera umbellata Essential Oil
Source: MDPI journal article supplement (doi:10.3390/molecules26175128), 2021-08-24
Supplement: s1 [file s1]

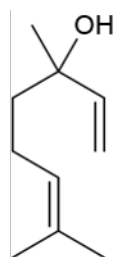

**Linalool**

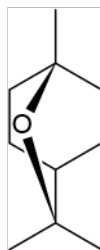

**1,8-cineole**

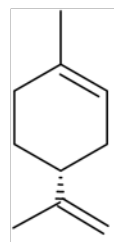

**D-limonene**

**Figure S1.** Structural formula of major components of the *Lindera umbellata* essential oil. The main components of the *Lindera umbellata* essential oil used in this study are Linalool (42.8%), 1,8-cineole (13.7%), and D-limonene (7.42%). The structural formula was drawn by ACD/ChemSketch Freeware (ver. 2021.1.0).
